# Supplementary material
Source: Royal Society of Chemistry journal article supplement (doi:10.1039/d6nj00450d)
Supplement: d6nj00450d1.pdf [file d6nj00450d1.pdf]

## SUPPORTING INFORMATION

### Design of Injectable Calcium Phosphate Cements Suitable for Spectral Photon Counting Computed Tomography Imaging

Maxence Limelette<sup>a</sup>, Szilvia Karpati<sup>b</sup>, Valérie Montouillout<sup>c</sup>, Riham Dessouky<sup>d,e</sup>, Frédéric Lerouge<sup>b</sup>, Franck Fayon<sup>c</sup>, Jean-Michel Bouler<sup>a,\*</sup>, Agnieszka Gutwinska<sup>d</sup>, Stéphane Parola<sup>b</sup>, Philippe Douek<sup>d</sup>, and Bruno Bujoli<sup>a</sup>

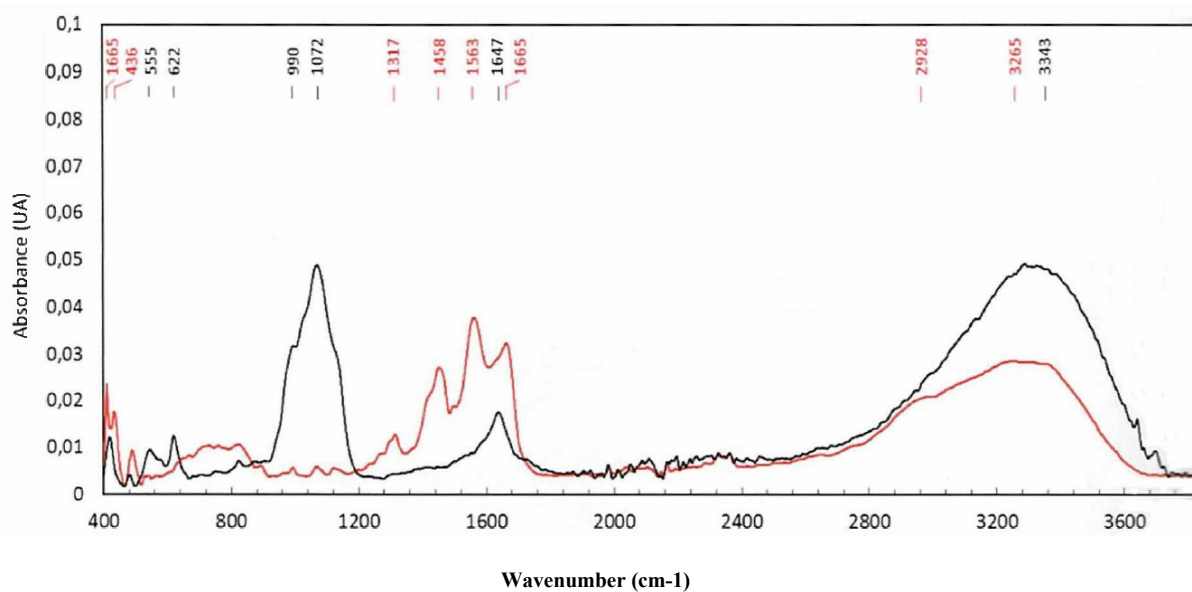

**Figure S1 :** FTIR spectra of GdF<sub>3</sub> nanoparticles (NPs) before (red line) and after (black line) precipitation in a 5% w/w Na<sub>2</sub>HPO<sub>4</sub> solution.

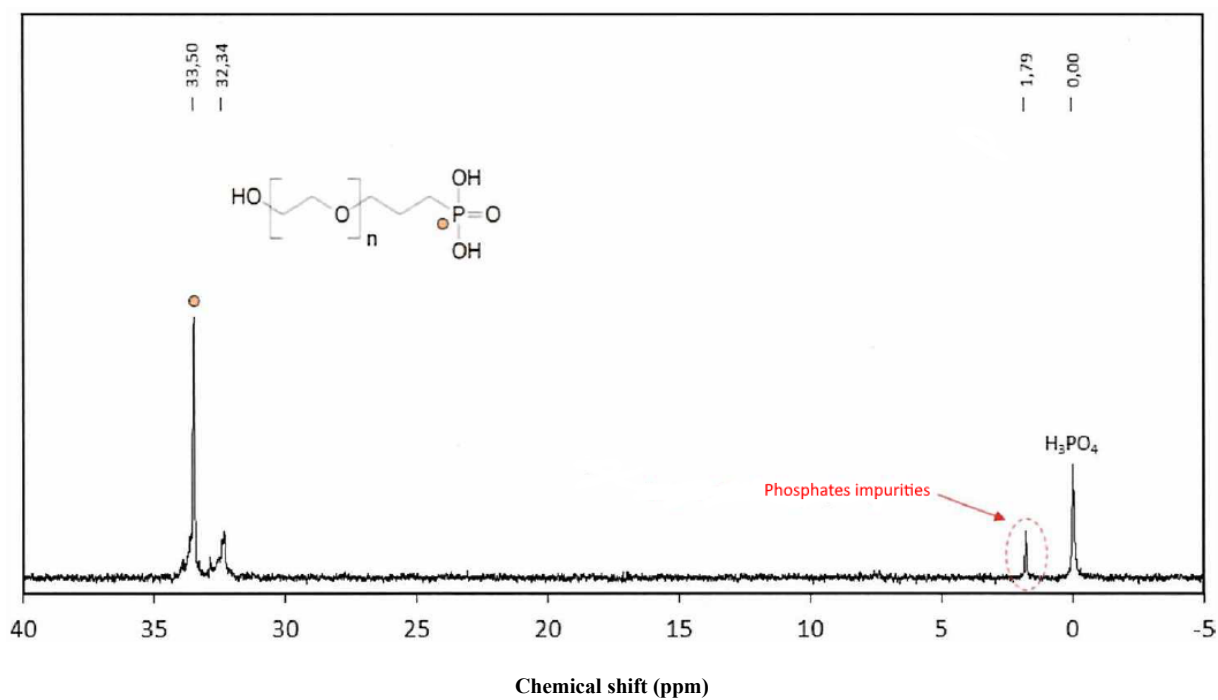

**Figure S2 :**  $^{31}P$  liquid NMR spectrum of commercial PPEG-10 ligand

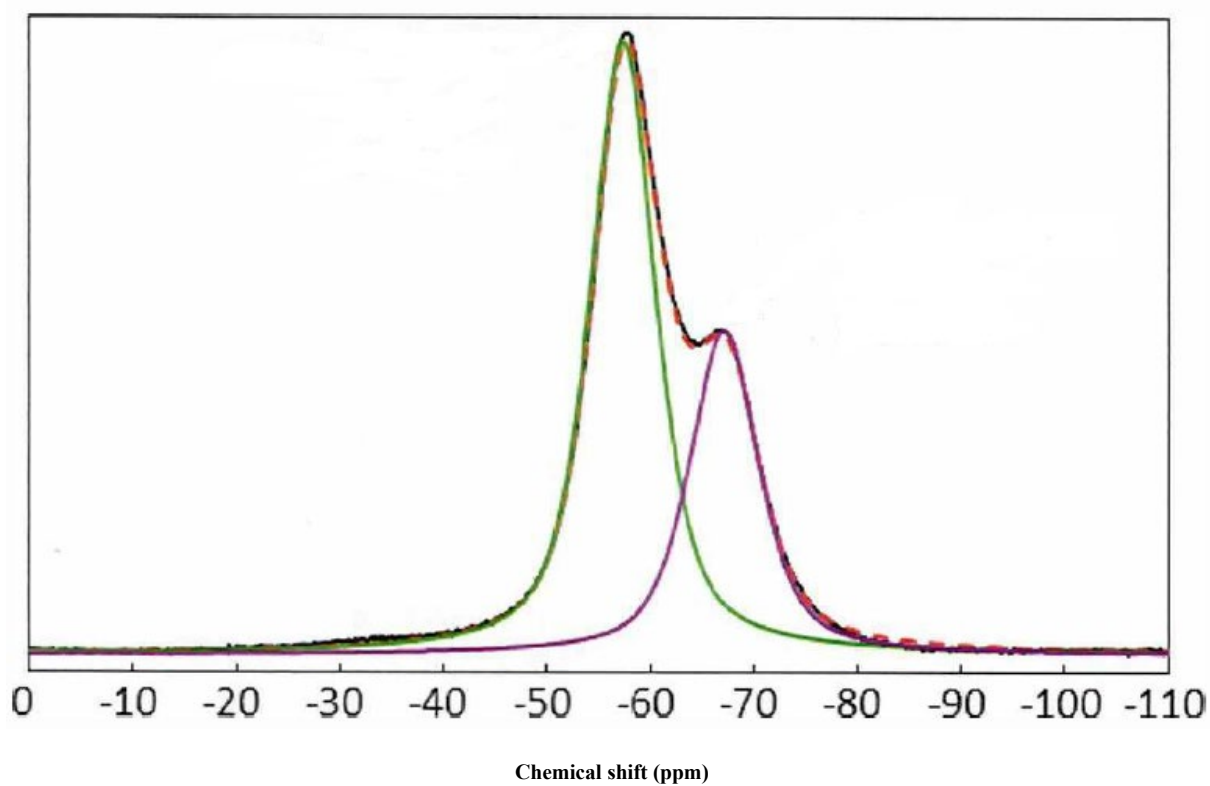

**Figure S3 :**  $^{19}F$  MAS NMR spectrum of YF3@PPEGi0 nanoparticles after precipitation in 5% w/w  $Na_2HPO_4$  solution.
